# Supplementary material for: Outcomes of Hospital Transfers for Pediatric Abdominal Pain and Appendicitis
Source: PubMed Central journal article supplement (PMC6324598; doi:10.1001/jamanetworkopen.2018.3249), 2018-10-12
Supplement: jamanetwopen-1-e183249-s001.pdf [file jamanetwopen-1-e183249-s001.pdf]

## Supplementary Online Content

França UL, McManus ML. Outcomes of Hospital Transfers for Pediatric Abdominal Pain and Appendicitis. *JAMA Netw Open*. 2018;1(6):e183249. doi:10.1001/jamanetworkopen.2018.3249

eAppendix. Supplementary Information

eReferences

eFigure. Outcomes of Transferred Patients

This supplementary material has been provided by the authors to give readers additional information about their work.

## eAppendix. Supplementary Information

### Hospital Capability and Regionalization Indices

We provide a brief overview of the pediatric Hospital Capability Indices (pHCI) used in the manuscript. A more complete discussion of the theoretical underpinnings and uses can be found at França & McManus (2017).<sup>1</sup> The index is based upon the *probability of care completion (P)*, defined as the ratio of the number admissions to the sum of admissions (*A*) and transfers (*T*) at a given hospital:

$$\mathcal{P}(h, \text{CCS}, \text{time}, \text{age}) = \frac{A(h, \text{CCS}, \text{time}, \text{age})}{A(h, \text{CCS}, \text{time}, \text{age}) + T(h, \text{CCS}, \text{time}, \text{age})}$$

The probability of care completion is defined by hospital (*h*), period of time, and CCS code, which give the *minimal* set of variables, but additional ones, such as age, can be used to stratify the population. Because we are interested in quantifying the hospital capability for pediatric patients (<18 years) during the years 2013-2014, the equation above can be rewritten as

$$\mathcal{P}(h, \text{CCS}, 2013 \ \& \ 2014, \text{age} < 18) = \frac{A(h, \text{CCS}, 2013 \ \& \ 2014, \text{age} < 18)}{A(h, \text{CCS}, 2013 \ \& \ 2014, \text{age} < 18) + T(h, \text{CCS}, 2013 \ \& \ 2014, \text{age} < 18)}$$

With this probability we can define the pediatric Hospital Capability Index (pHCI), which quantifies the breadth of capability of a hospital to treat *all* medical conditions requiring at least 20 admissions in an acute care hospital during the period of interest. Following the discussion in Ref. 1 (see also the eAppendix of Ref. 2), the pHCI of a hospital is defined as:

$$\text{pHCI}(h, 2013 \ \& \ 2014, \text{age} < 18) = \frac{\sum_{\text{CCS}} \mathcal{P}(h, \text{CCS}, 2013 \ \& \ 2014, \text{age} < 18)}{\text{Number of CCS codes}(2013 \ \& \ 2014, \text{age} < 18)}$$

### eReferences

1. França UL, McManus ML. Transfer Frequency as a Measure of Hospital Capability and Regionalization. *Health Services Research* 2017;52(6):2237–2255. doi:10.1111/1475-6773.12583.
2. França UL, McManus ML. Availability of Definitive Hospital Care for Children. *JAMA Pediatr.* 2017;171(9):e171096. doi:10.1001/jamapediatrics.2017.1096.

# Outcomes of transferred patients

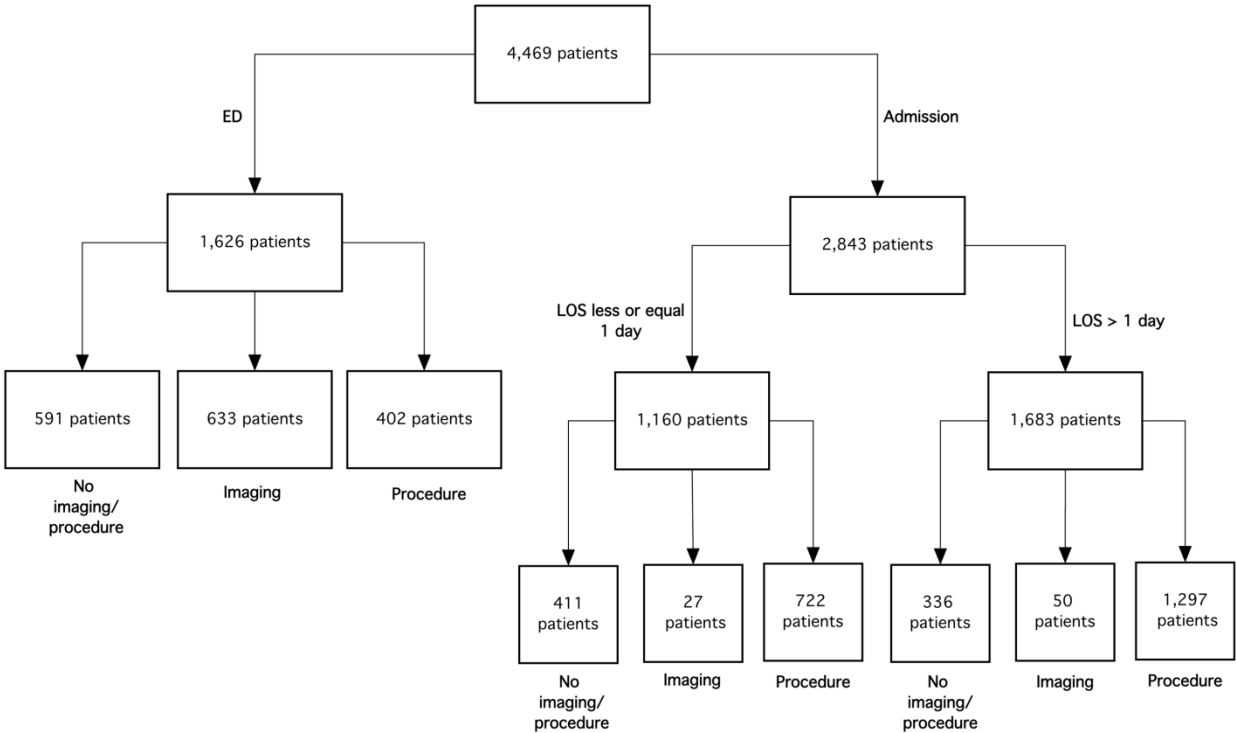

**eFigure:** Outcomes at the receiving hospitals for the patients in the study cohort based on the discharge hospital setting and outcome of hospital encounter. ED: Emergency department; LOS: Length of Stay.
